# Supplementary material for: Ablation of hippocampal neurogenesis in mice impairs the response to stress during the dark cycle
Source: PubMed Central journal article supplement (PMC4598562; doi:10.1038/ncomms9373), 2015-09-29
Supplement: ncomms9373-s1.pdf [file ncomms9373-s1.pdf]

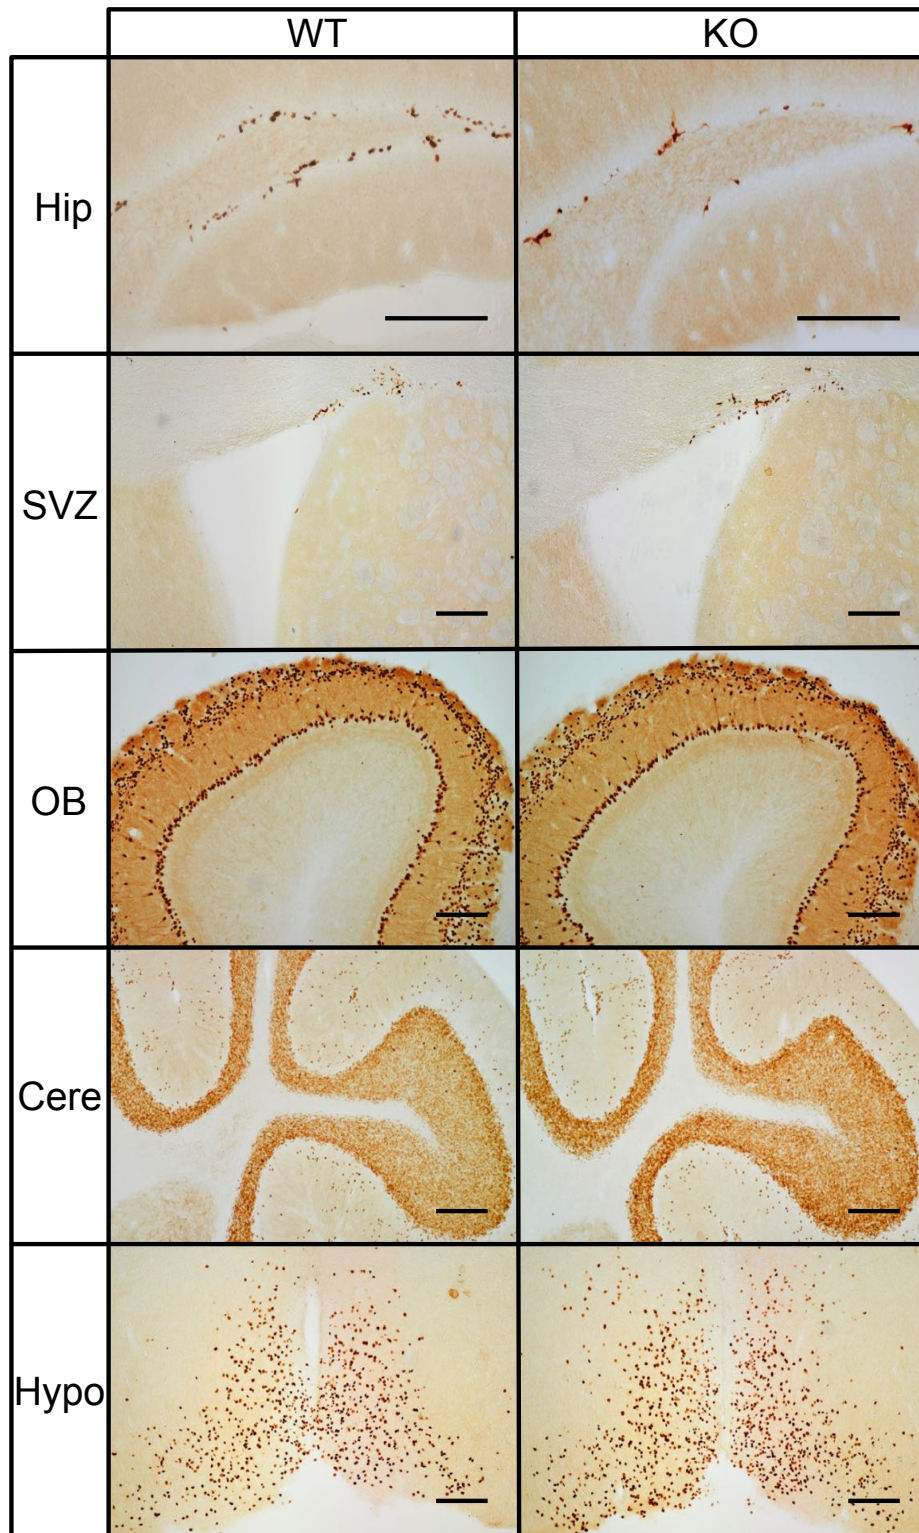

**Supplementary Fig. 1: TBR2<sup>+</sup> cells in different brain regions.**

Three weeks after the last tamoxifen injection, TBR2 immunostaining images reveal a large reduction of TBR2<sup>+</sup> cells in the dentate gyrus but not in the subventricular zone, olfactory bulb, cerebellum, and hypothalamus. Scale bars = 200  $\mu$ m.

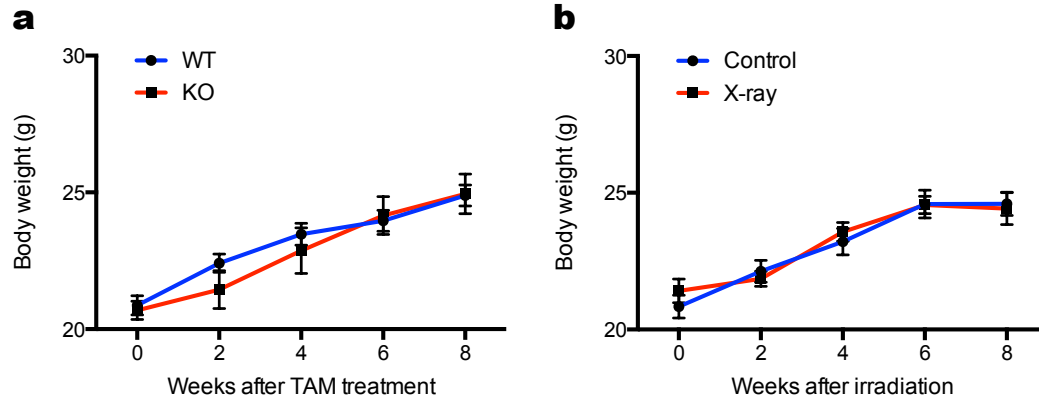

**Supplementary Fig. 2: Body weight after TAM treatment or irradiation.**

(a) No difference in body weight between *Tbr2* KO and WT mice ( $n = 9$  and  $11$ ). (b) No difference in body weight between control and irradiated mice ( $n = 11$  and  $9$ ).

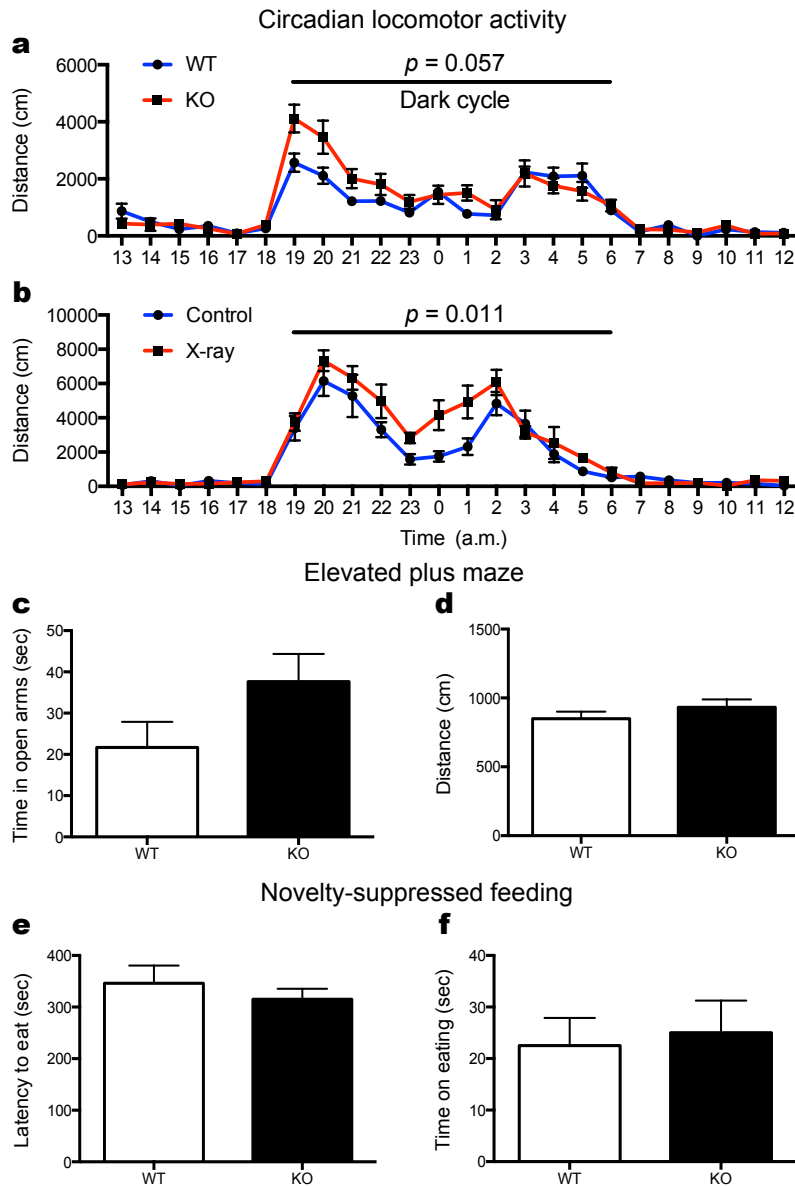

**Supplementary Fig. 3: Locomotor activity and anxiety tests.**

(a) 10 weeks after tamoxifen injection to deplete hippocampal neurogenesis, *Tbr2* KO mice have a trend towards a higher activity level compared to WT mice in the 24-hour locomotor activity test ( $n = 8$ , Repeated Measures ANOVA; effect of genotype,  $F_{1,154} = 4.28$ ,  $p = 0.057$ ) in the dark cycle. (b) 10 weeks after X-irradiation on the hippocampus to block neurogenesis, irradiated mice show increased activity in the locomotor activity box in the dark cycle compared to sham mice ( $n = 8$ , Repeated Measures ANOVA; effect of X-ray,  $F_{1,154} = 8.58$ ,  $p = 0.01$ ). (c, d) In the EPM test during the day, there was no differences in time spent in the open arms or the distance travelled between KO and WT mice ( $n = 10$ ). (e, f) In the NSF test during the day, there was no differences in latency to eat or time spent on eating between WT and KO mice ( $n = 10$ ).

### Elevated plus maze

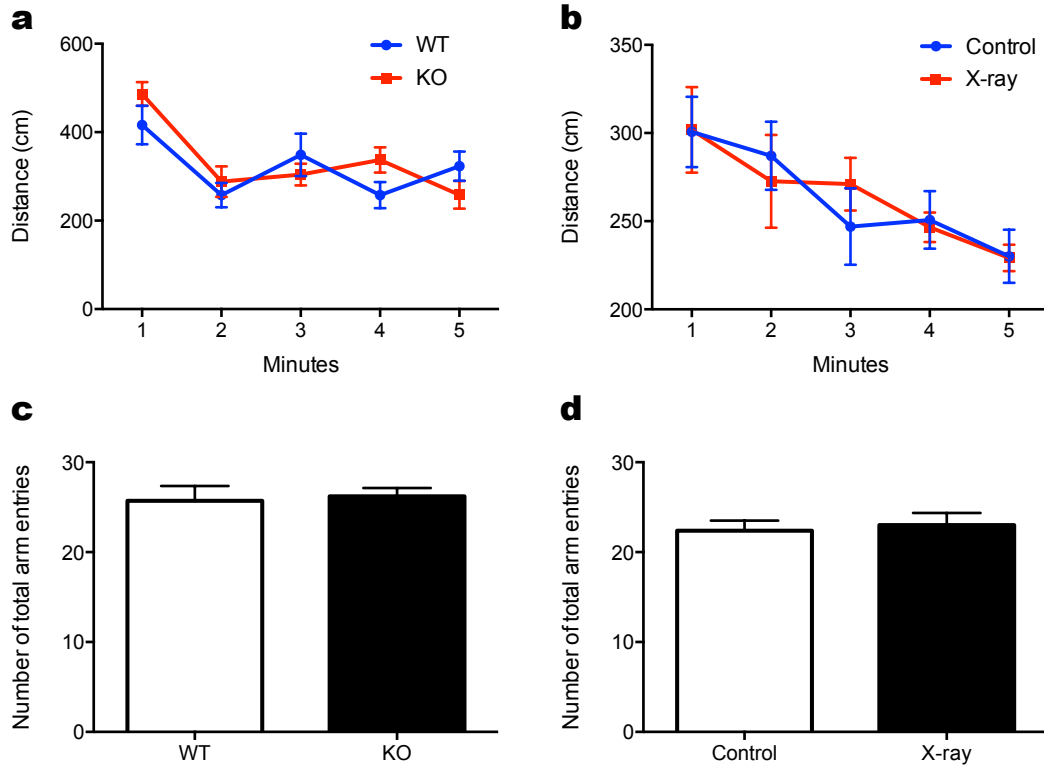

#### Supplementary Fig. 4: Activity in elevated plus maze.

No differences in total distance travelled (a, b) in both *Tbr2* mouse model (KO vs WT,  $n = 10$ ) and irradiated mouse model (Control vs X-ray,  $n = 12$ ), nor the total number of arm entries in both groups (c, d).

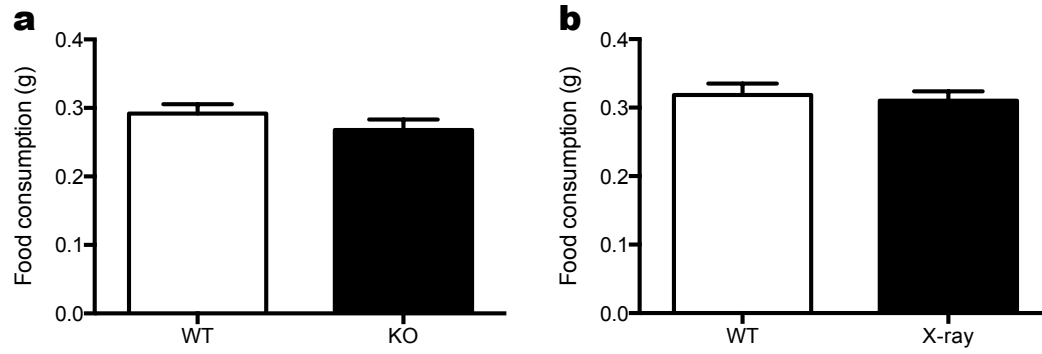

**Supplementary Fig. 5: Home cage food consumption.**

There are no significant differences in food consumption within 10 min after 24 h food deprivation for *Tbr2* KO animal model ( $n = 10$ ) (a) and irradiation animal model ( $n = 12$ ) (b) in their home cage.

|         | EPM                    |               | NSF                  |               |
|---------|------------------------|---------------|----------------------|---------------|
|         | Time in open arm (sec) | Distance (cm) | Time on eating (sec) | Latency (sec) |
| WT      | 19.7 ± 2.7             | 1603 ± 101    | 53.5 ± 17.8          | 317.2 ± 67.4  |
| KO      | 28.4 ± 2.8             | 1675 ± 73     | 98 ± 10.8            | 210 ± 33.9    |
| Control | 43.6 ± 4.7             | 1316 ± 61     | 44.5 ± 12.6          | 421.5 ± 38.1  |
| X-ray   | 55.1 ± 2.8             | 1322 ± 64     | 147.1 ± 24           | 242.1 ± 56.3  |

**Supplementary Fig. 6: Absolute values of anxiety behaviors.**

Absolute values of elevated plus maze and novelty suppressed feeding tests for *Tbr2* mice (WT vs KO) and irradiated mice (Control vs X-ray). Values represent mean ± SEM.

## Forced swimming

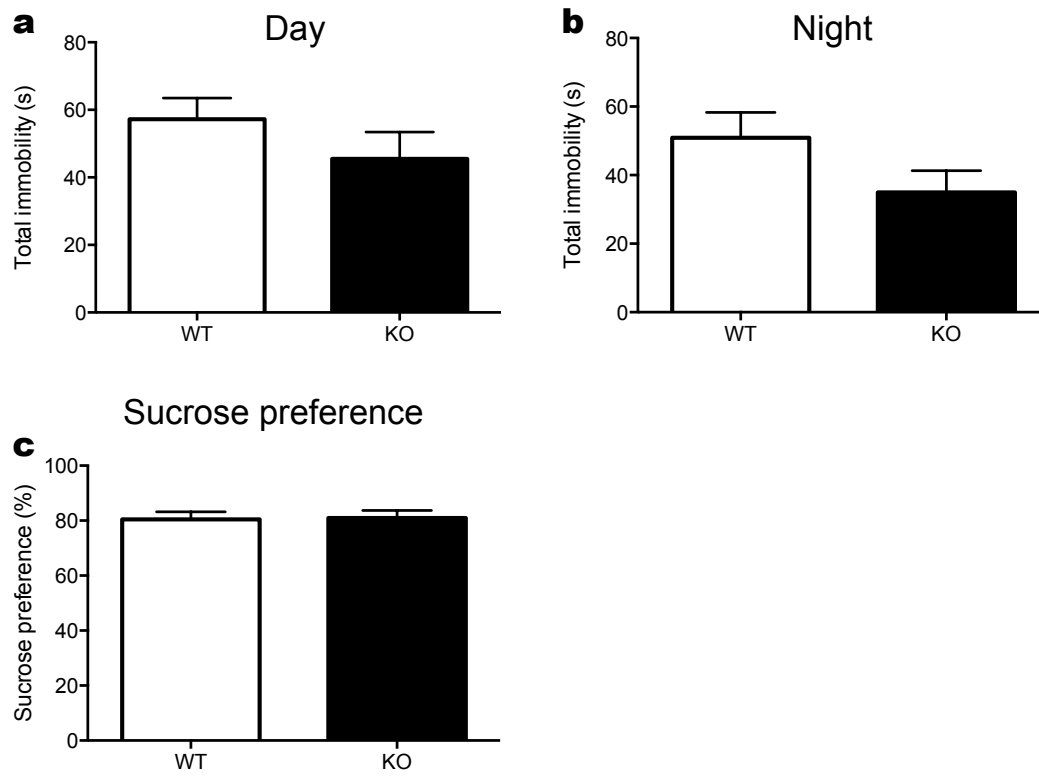

### Supplementary Fig. 7: Forced swimming and sucrose preference tests.

No significant differences in forced swimming test in day time ( $n = 8$ ) (a) or night time ( $n = 10$ ) (b). c, No difference in sucrose preference (night time) between WT and KO mice ( $n = 8$ ).

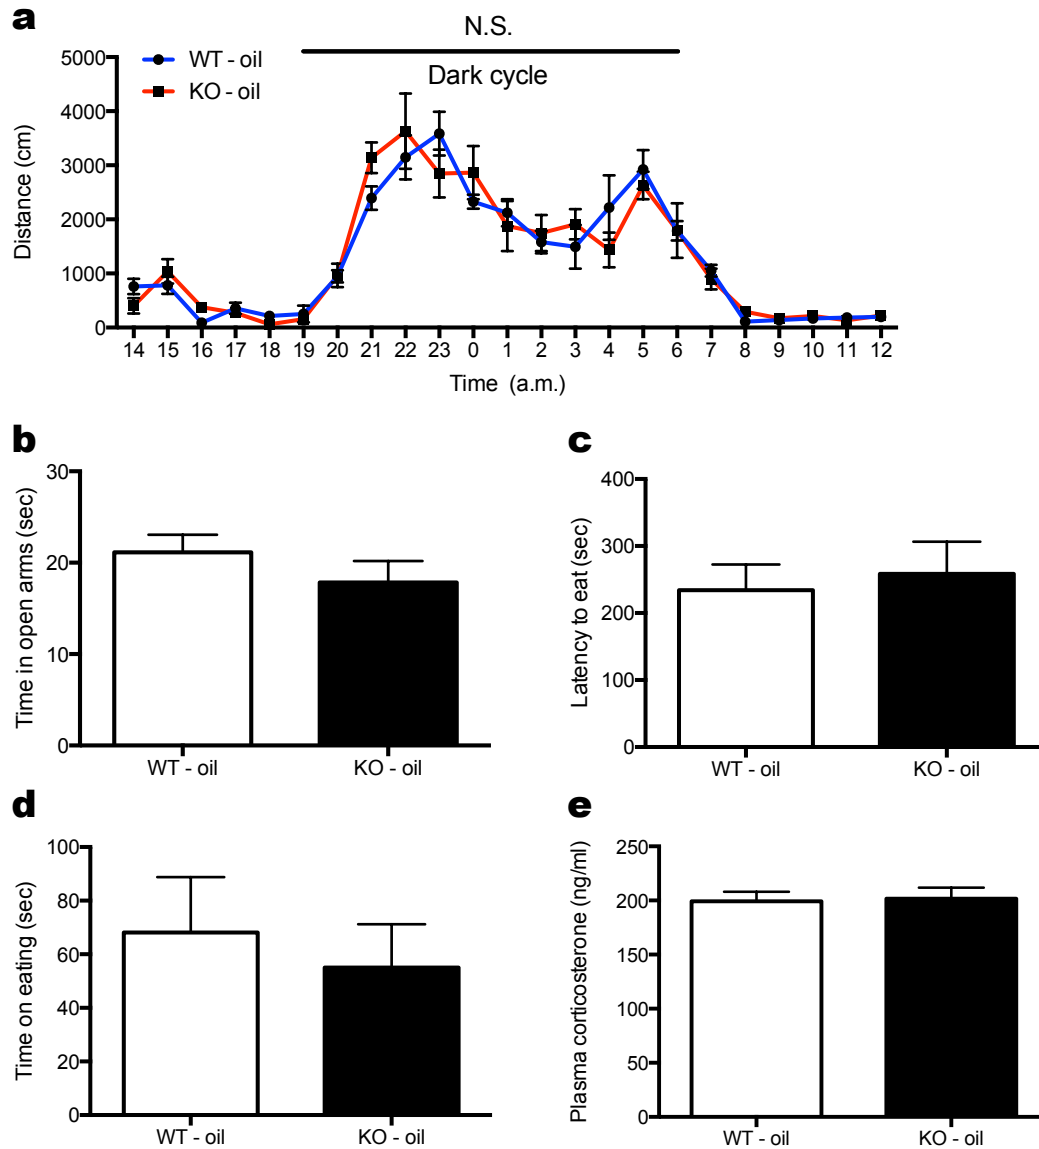

**Supplementary Fig. 8: Locomotor activity and anxiety test in oil-injected control.**

**a**, There was no difference in activity between WT and KO mice with oil injection ( $n = 8$ ). **b-e**, There was no differences in EPM test (**b, c**) and NSF test (**d, e**) between *Tbr2* inducible KO mice and WT mice with oil injection ( $n = 8$ ).



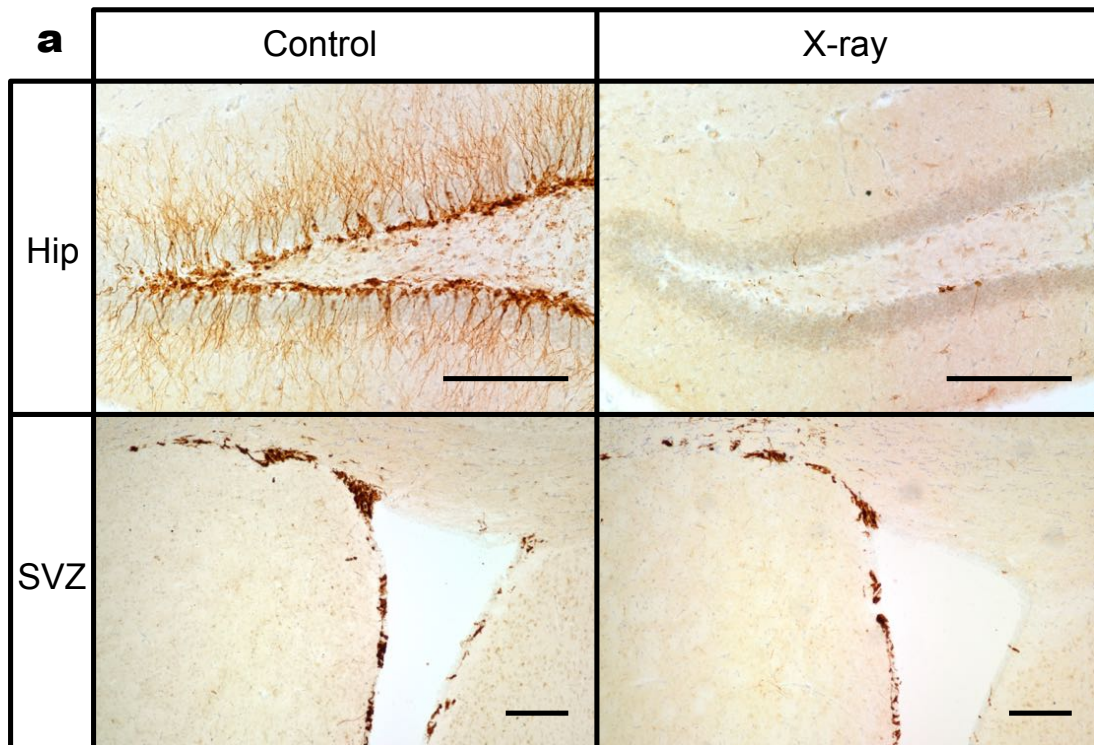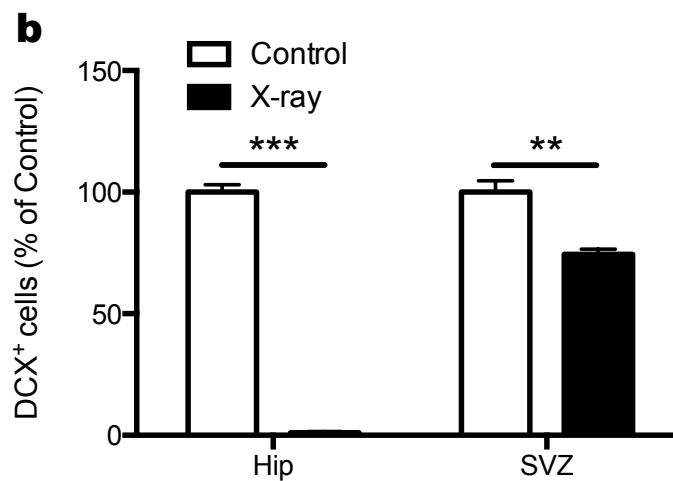

**Supplementary Fig. 9: Depleting neurogenesis with X-irradiation.**

**a, b,** Three weeks after X-Irradiation exposure to the middle part of the brain resulted in almost complete depletion of neurogenesis in the dentate gyrus. In contrast 75% DCX<sup>+</sup> cells remain in the SVZ (*n* = 5). Scale bars = 200 μm.

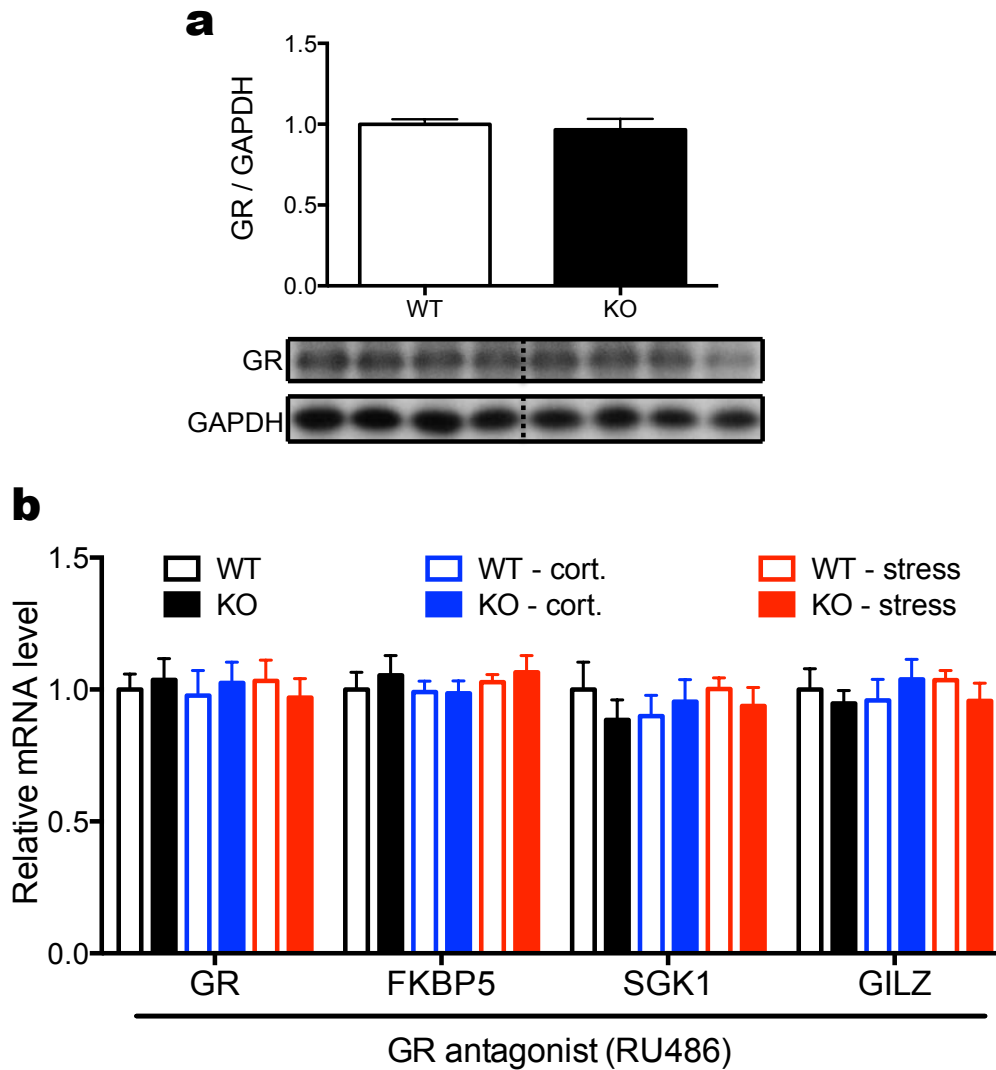

**Supplementary Fig. 10: GR protein level in the dentate gyrus and GR antagonist blocked the expression changes in GR target genes.**

**a**, Western blot analysis of GR protein level in the dentate gyrus does not show differences between KO and WT ( $n = 4$ ). **b**, All mice ( $n = 6 - 8$ ) were administered RU486 one hour before corticosterone injection or stress: gene expression analysis showed no difference in GR target genes in the hippocampus 30 min after corticosterone injection or stress.

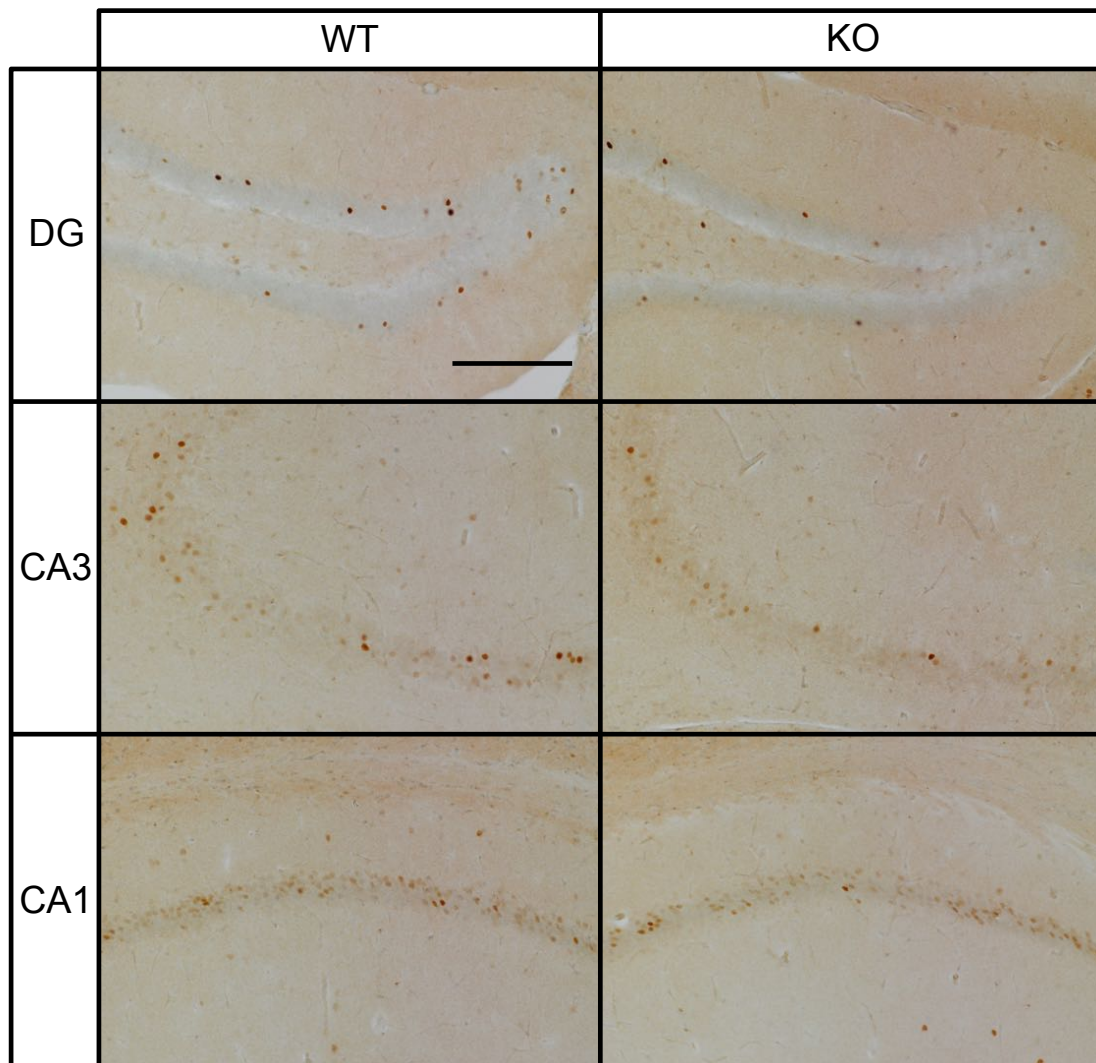

**Supplementary Fig. 11: c-Fos<sup>+</sup> cells in the hippocampus.**

c-Fos immunostaining images showed more c-Fos<sup>+</sup> cells in the DG and CA3 of WT mice compared to KO mice, but no difference in CA1 region 90 min after restraint stress started. Scale bars = 200  $\mu$ m.

Fig. 4a

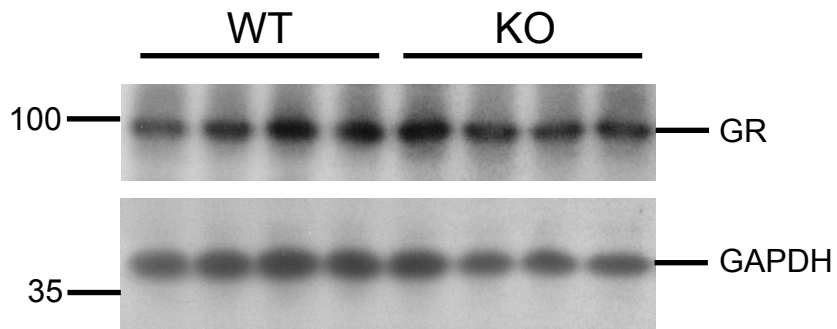

Supplementary Fig. 10a

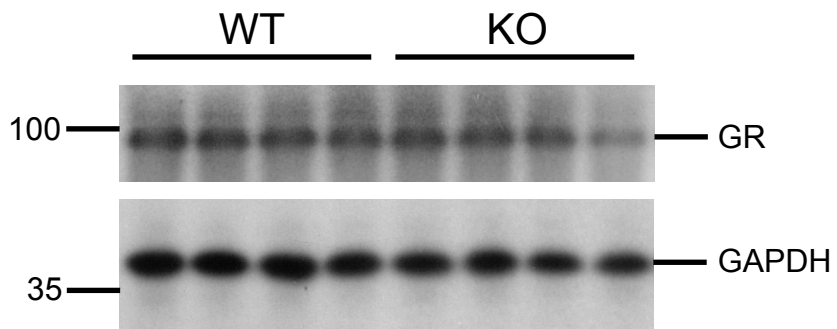

**Supplementary Fig. 12: Uncropped scan of western blots.**

Uncropped Western blot images of GR and GAPDH (loading control) protein level in the hippocampus (Fig. 4a) and dentate gyrus (Supplementary Fig. 10a).
